# Supplementary material
Source: HighWire-hosted journal article supplement (https://jitc.bmj.com/content/10/6/e004210)
Supplement: inline-supplementary-material-1 [file inline-supplementary-material-1.xlsx]

## Sheet: Readme
Table S1: Neutrophils-associated gene set
Table S2: NETs-related gene set summarized in the literature review
Table S3: Samples information of pan-cancer in TCGA
Table S4: Gene sets related to angiogenesis, cell proliferation, and epithelial to mesenchymal transition.
Table S5: Characteristics of patients with four tumors, including lung adenocarcinoma (LUAD), colon adenocarcinoma (COAD), kidney renal clear cell carcinoma (KIRC) and triple-negative breast cancer (TNBC).
Table S6: 19-gene NETs-characteristic signature with the risk coefficients

## Sheet: Table S1
	Gene ID		Description
HGNC symbol	Entrez Gene	Ensembl	(coding protein)
ALPL	249	ENSG00000162551	Alkaline phosphatase, biomineralization associated
BST1	683	ENSG00000109743	Bone marrow stromal cell antigen 1
CD93	22918	ENSG00000125810	CD93 antigen
CEACAM3	1084	ENSG00000170956	Carcinoembryonic antigen-related cell adhesion molecule 3
CREB5	9586	ENSG00000146592	Cyclic AMP-responsive element-binding protein 5
CRISPLD2	83716	ENSG00000103196	Cysteine rich secretory protein LCCL domain containing
CSF3R	1441	ENSG00000119535	Colony stimulating factor 3 receptor
CYP4F3	4051	ENSG00000186529	Cytochrome P450 family 4 subfamily F member 3
DYSF	8291	ENSG00000135636	Dysferlin
FCAR	2204	ENSG00000186431	Fc fragment of IgA receptor
FCGR3B	2215	ENSG00000162747	Fc fragment of IgG receptor IIIb
CPPED1	55313	ENSG00000103381	Calcineurin like phosphoesterase domain containing
FPR1	2357	ENSG00000171051	Formyl peptide receptor 1
FPR2	2358	ENSG00000171049	Formyl peptide receptor 2
G0S2	50486	ENSG00000123689	G0/G1 switch 2
HIST1H2BC	8347	ENSG00000180596	H2B clustered histone 4
HPSE	10855	ENSG00000173083	Heparanase
CXCR1	3577	ENSG00000163464	C-X-C motif chemokine receptor 1
CXCR2	3579	ENSG00000180871	C-X-C motif chemokine receptor 2
KCNJ15	3772	ENSG00000157551	Potassium inwardly rectifying channel subfamily J member 15
LILRB2	10288	ENSG00000131042	Leukocyte immunoglobulin like receptor B2
MGAM	8972	ENSG00000257335	Maltase-glucoamylase
MME	4311	ENSG00000196549	Membrane metalloendopeptidase
PDE4B	5142	ENSG00000184588	Phosphodiesterase 4B
S100A12	6283	ENSG00000163221	S100 calcium binding protein 2
SIGLEC5	8778	ENSG00000105501	Sialic acid binding Ig like lectin 5
SLC22A4	6583	ENSG00000197208	Solute carrier family 22 member 4
SLC25A37	51312	ENSG00000147454	Solute carrier family 25 member 37
TECPR2	9895	ENSG00000196663	Tectonin beta-propeller repeat containing 2
TNFRSF10C	8794	ENSG00000173535	TNF receptor superfamily member 10c
VNN3	55350	ENSG0000093134	Vascular non-inflammatory molecule 3

## Sheet: Table S2
	Gene ID		Description
HGNC symbol	Entrez Gene	Ensembl	(coding protein)
AKT1	207	ENSG00000142208	AKT serine/threonine kinase 1
AKT2	208	ENSG00000105221	AKT serine/threonine kinase 2
ATG7	10533	ENSG00000197548	Autophagy related 7
CLEC6A	93978	ENSG00000205846	Dectin-2
CSF3	1440	ENSG00000108342	Granulocyte colony stimulating factor
CTSG	1511	ENSG00000100448	Cathepsin G
CYBB	1536	ENSG00000165168	NADPH oxidase
DNASE1	1773	ENSG00000213938	Deoxyribonuclease I
ELANE	1991	ENSG00000197561	Neutrophil elastase
ENTPD4	14573	ENSG00000197217	Ectonucleoside Triphosphate Diphosphohydrolase 4
F3	2152	ENSG00000117525	Coagulation Factor III, tissue factor
HMGB1	3146	ENSG00000189403	High mobility group box 1
IL17A	3605	ENSG00000112115	Interleukin 17
IL1B	3553	ENSG00000125538	Interleukin 1 beta
IL6	3569	ENSG00000136244	Interleukin 6
IL8	3576	ENSG00000169429	Interleukin 8
IRAK4	51135	ENSG00000198001	Interleukin 1 receptor associated kinase 4
ITGAM	3684	ENSG00000169896	Complement component 3 receptor 3 subunit
ITGB2	3689	ENSG00000160255	Complement component 3 receptor 3 and 4 subunit
KCNN3	3782	ENSG00000143603	Potassium channel, calcium activated
MAPK1	5594	ENSG00000100030	Mitogen-activated protein kinase 1
MAPK3	5595	ENSG00000102882	Mitogen-activated protein kinase 3
MMP9	4218	ENSG00000100985	Matrix metallopeptidase 9
MPO	4353	ENSG00000005381	Myeloperoxidase
MTOR	2475	ENSG00000198793	Mechanistic target of rapamycin kinase
PADI4	23569	ENSG00000159339	Peptidyl arginine deiminase 4
PTAFR	5724	ENSG00000169403	Platelet activation factor receptor
PIK3CA	5290	ENSG00000121879	Phosphatidylinositol-4,5-bisphosphate 3-kinase
RIPK1	8737	ENSG00000137275	Receptor interacting serine/threonine kinase 1
RIPK3	11035	ENSG00000129465	Receptor interacting serine/threonine kinase 3
SELP	6403	ENSG00000174175	P-selectin
SELPLG	6404	ENSG00000110876	P-selectin receptor
SIGLEC14	10049587	ENSG00000254415	Sialic acid binding Ig like lectin 4
TLR2	7097	ENSG00000137462	Toll like receptor 2
TLR4	7099	ENSG00000136869	Toll like receptor 4
TLR7	51284	ENSG00000196664	Toll like receptor 7
TLR8	51311	ENSG00000101916	Toll like receptor 8
TNF	7124	ENSG00000232810	Tumor necrosis factor-alpha

## Sheet: Table S3
	Cancer Types	Numbers of Samples
Abbreviations	Full Name	(Train)	(Test)
ACC	adrenocortical carcinoma	60	15
BLCA	bladder urothelial carcinoma	288	104
BRCA	breast invasive carcinoma	726	332
CESC	cervical squamous cell carcinoma and endocervical adenocarcinoma	214	73
CHOL	cholangiocarcinoma	24	11
COAD	colon adenocarcinoma	192	75
DLBC	lymphoid neoplasm diffuse large B-cell lymphoma	37	9
ESCA	esophageal carcinoma	133	46
GBM	glioblastoma multiforme	109	30
HNSC	head and neck squamous cell carcinoma	328	163
KICH	kidney chromophobe	41	24
KIRC	kidney renal cell carcinoma	369	148
KIRP	kidney renal papillary carcinoma	195	86
LGG	brain lower grade glioma	328	168
LIHC	liver hepatocellular carcinoma	235	120
LUAD	lung adenocarcinoma	334	131
LUSC	lung squamous cell carcinoma	294	145
MESO	mesothelioma	45	20
OV	ovarian serous cystadenocarcinoma	284	103
PAAD	pancreatic adenocarcinoma	121	50
PCPG	pheochromocytoma and paraganglioma	126	51
PRAD	prostate adenocarcinoma	350	143
READ	rectum adenocarcinoma	57	28
SARC	sarcoma	192	60
SKCM	skin cutaneous melanoma	64	37
STAD	stomach adenocarcinoma	247	118
TGCT	testicular germ cell tumors	98	34
THCA	thyroid carcinoma	344	153
THYM	thymoma	81	37
UCEC	uterine corpus endometrial carcinoma	117	59
UCS	uterine carcinosarcoma	38	16
UVM	uveal melanoma	46	33

## Sheet: Table S4
Angiogenesis	G1S	G2M	Epithelial to Mesenchymal Transition
CDH5	MCM5	HMGB2	TGFBR3
ADGRL4	PCNA	CDK1	ENG
CLEC14A	TYMS	NUSAP1	AKNA
LDB2	FEN1	UBE2C	TGFBR3L
ECSCR	MCM2	BIRC5	RBPJ
MYCT1	MCM4	TPX2	DDX5
RHOJ	RRM1	TOP2A	FGFR2
VWF	UNG	NDC80	TGFB2
TIE1	GINS2	CKS2	TGFBR1
KDR	MCM6	NUF2	TGFB1
ESAM	CDCA7	CKS1B	PTPN21
PTPRB	DTL	MKI67	NOTCH4
ADGRF5	PRIM1	TMPO	SNAI2
SPARCL1	UHRF1	CENPF	DLG5
EMCN	MLF1IP	TACC3	FAM83D
ROBO4	HELLS	FAM64A	HIF1A
ENG	RFC2	SMC4	BMP2
TEK	RPA2	CCNB2	NFATC1
S1PR1	NASP	CKAP2L	EPB41L5
A2M	RAD51AP1	CKAP2	HMGA2
JAM2	GMNN	AURKB	WNT4
COL15A1	WDR76	BUB1	ROCK1
PECAM1	SLBP	KIF11	CUL7
CALCRL	CCNE2	ANP32E	FLNA
CLEC3B	UBR7	TUBB4B	DDX17
PLVAP	POLD3	GTSE1	SLC39A6
RGS5	MSH2	KIF20B	STAT3
LRRC32	ATAD2	HJURP	ERBB2
EBF1	RAD51	CDCA3	LOXL2
ADCY4	RRM2	HN1	FGFR1
ACVRL1	CDC45	CDC20	BMP7
ADGRA2	CDC6	TTK	SOX9
APLNR	EXO1	CDC25C	LOXL3
TM4SF18	TIPIN	KIF2C	WNT5A
GNG11	DSCC1	RANGAP1	AMELX
CNRIP1	BLM	NCAPD2	NOTCH1
ZNF423	CASP8AP2	DLGAP5	HGF
GIMAP8	USP1	CDCA2	GSK3B
PDGFD	CLSPN	CDCA8	TRIM28
ITGA9	POLA1	ECT2	NOG
EDNRB	CHAF1B	KIF23	HNRNPAB
	BRIP1	HMMR	WNT11
	E2F8	AURKA	S100A4
		PSRC1	LEF1
		ANLN	GSK3A
		LBR	RFLNB
		CKAP5	FOXF2
		CENPE	CTNNB1
		CTCF	PPP3R1
		NEK2	SNAI1
		G2E3	ROCK2
		GAS2L3	MSX1
		CBX5	TRIP10
		CENPA

## Sheet: Table S5
Characteristics	MM
Lung adenocarcinoma
Gender	20/38
Age	60(26/76)
TP53 mutation
Yes	30
No	28
EGFR mutation
Yes	32
No	26
KRAS mutation
Yes	2
No	56
TNM stage
I	26
II	12
III	19
IV	1
T stage
T1	11
T2	33
T3	9
T4	5
N stage
N0	35
N1	7
N2	16
Differentiation
Well	4
Moderate	26
Poor	28
Colon adenocarcinoma
Gender (male/female)	52/41
Age	68(22-93)
TNM stage
I	4
II	41
III	35
IV	4
NA	9
Differentiation
Moderate	75
Poor	18
MS
MSS	84
MSI	9
Pathology type
CRC	86
MAC	7
Pathology grade
I	9
II	66
III	15
Metastasis
Yes	4
NO	89
Kidney renal clear cell carcinoma
Gender (male/female)	51/39
Age	59(29-82)
TNM stage
I	60
II	18
III	4
IV	2
NA	6
Tstage
T1	63
T2	18
T3	5
NA	4
Nstage
N0	87
N1	1
NA	2
Differentiation
Well	33
Moderate	42
Poor	15
Pathology grade
I	33
II	42
III	28
IV	1
Triple-negative breast cancer
Gender (male/female)	0/80
Age	61(37-84)
TNM stage
I	19
II	35
III	26
Pathology grade
I	5
II	38
III	37

## Sheet: Table S6
Gene	IL8	BST1	FPR2	CYP4F3	CREB5	G0S2	F3
β	0.268	0.267	0.191	0.167	0.141	0.134	0.103
Gene	VNN3	S100A12	MPO	HPSE	IL17A	ENTPD4	MME
β	0.091	0.071	0.062	0.056	-0.069	-0.086	-0.116
Gene	SLC22A4	CEACAM3	TNFRSF10C	CLEC6A	SELP
β	-0.128	-0.149	-0.155	-0.218	-0.297
